# Supplementary material
Source: PubMed Central journal article supplement (PMC3147630)
Supplement: supp_55_8_3947__1.pdf [file supp_55_8_3947__1.pdf]

**Supplement to Healey et al., “*Candida glabrata* mutants demonstrating paradoxical caspofungin reduced susceptibility but micafungin increased susceptibility”**

TABLE S1. DNA primers used in this study

| Primer <sup>a</sup>   | Application       | Sequence (5′-3′)                                                                                                    |
|-----------------------|-------------------|---------------------------------------------------------------------------------------------------------------------|
| CgFKS1c1-ScURA3F      | <i>fks1Δ</i>      | <u>TCTTTCATTTCTAGAGTTTTATCTTTTTTTTTTTTGGCTCTTGTTTGATATACATTC</u><br><u>GCTATGTCGAAAAGCTACATATAAGGA</u> <sup>b</sup> |
| CgFKS1c620-ScURA3dR   | <i>fks1Δ</i>      | <u>AGTGGTAGACAAAATTCTGATTGGATCTCTTAGAGATAGAATCAAGAAGTAGTA</u><br><u>TGATTCGGTATTTTCACACCCGCATAGG</u> <sup>b</sup>   |
| CgFKS2c1-ScURA3F      | <i>fks2Δ</i>      | <u>CAAGTCTCTATCAGCCAATAAAGGAATAAGAACAAGACAGAAAAAGAAAAATTCC</u><br><u>AACCATGTCGAAAAGCTACATATAAGG</u> <sup>b</sup>   |
| CgFKS2c1897-ScURA3R   | <i>fks2Δ</i>      | <u>ATTCTTAATTAGAAAAATTCTTGAAAAATCATACTCAATTAGGGGATTATCTATT</u><br><u>GCCTCTTTAGTTTTGCTGGCCGCATC</u> <sup>b</sup>    |
| CgFKS3c584-ScURA3uF   | <i>fks3Δ</i>      | <u>TCATTGCAAAATATGTTGAATCTTACTTTTTTTTTTAACGTTGAGTGCACCATAACC</u><br><u>ACAGCT</u> <sup>b</sup>                      |
| CgFKS3c1324F-ScURA3dR | <i>fks3Δ</i>      | <u>GCAATAAAGAATACAATAAATATGGAAAAATACAAAAATTGGGTATTTTCACACCG</u><br><u>CATAGG</u> <sup>b</sup>                       |
| CgFKS1u225F           | amplify           | AGGGTCTTTTCGAATCTTGCT                                                                                               |
| CgFKS1c622R           | amplify           | GATTCAGCGTACTTAGCAGC                                                                                                |
| CgFKS1u115F           | sequence          | ATAACAAATTCACATTCGCTTAG                                                                                             |
| CgFKS1c207F           | sequence          | CAAGAAATGGTACTTCGCCG                                                                                                |
| CgFKS1c558F           | amplify           | GTTGCAGTCGCTACATTGCTA                                                                                               |
| CgFKS1c1242R          | amplify           | AATTGTACCAAAACCTAAATCTC                                                                                             |
| CgFKS1c594F           | sequence          | CCTCCTTTGCACCTTTGCAT                                                                                                |
| CgFKS1c828F           | sequence          | TTTACCGTTTTGACTCCTCAC                                                                                               |
| CgFKS1c999F           | sequence          | CCACATGAACTGGAAAACGC                                                                                                |
| CgFKS1c1214F          | amplify, sequence | GAATGCCCTATTACGTGGTG                                                                                                |
| CgFKS1d118R           | amplify           | TGTAGTATGGAGTAAATGATG                                                                                               |
| CgFKS1c1446F          | sequence          | GTTGCTTTTCGGTACCGTTG                                                                                                |
| CgFKS1c1649F          | sequence          | GGGTTCTTGAAGGTTTCAACT                                                                                               |
| CgFKS2u114F           | amplify           | CGCTTAAGTTAAAGAACAAGGT                                                                                              |
| CgFKS2c1000R          | amplify           | TCTCTCTCAAGACCTTCAGC                                                                                                |
| CgFKS2u61F            | sequence          | TCCCAAGTCTCTATCAGCCA                                                                                                |
| CgFKS2c218F           | sequence          | AAGCGTTGCTATCTGTCCAC                                                                                                |
| CgFKS2c473F           | sequence          | GGATTATGCACGTTTCCGTC                                                                                                |
| CgFKS2c730F           | sequence          | TTCCATCTTAACCTCCTTGAG                                                                                               |
| CgFKS2c965F           | amplify           | CCCAAACCTTGTACCGTACT                                                                                                |
| CgFKS2d187R           | amplify           | AGACTGTTATTGTTACCATCGC                                                                                              |
| CgFKS2c974F           | sequence          | TCATGAACTACGCTAGAGCG                                                                                                |
| CgFKS2c1225F          | sequence          | GAAGTGGTCTATCCAAGGCT                                                                                                |
| CgFKS2c1471F          | sequence          | GGCCAGATCTATGCTGATGT                                                                                                |
| CgFKS2c1719F          | sequence          | ATGACCATGCTAACACGGCT                                                                                                |
| CgFKS3u136F           | amplify           | TCTGCGATAAGTGGAGTTTC                                                                                                |
| CgFKS3c828R           | amplify           | CCATTCTTCGGGATGAAGGT                                                                                                |
| CgFKS3u97F            | sequence          | ACTCTAATAACCTTGGAACTAG                                                                                              |
| CgFKS3c231F           | sequence          | TGAAAGACCTAACCCCAAAAC                                                                                               |
| CgFKS3c495F           | sequence          | CAATGTTCACTCGAAAATCTGC                                                                                              |
| CgFKS3c769F           | amplify           | CACTGTCGACCCCATATTG                                                                                                 |
| CgFKS3d30R            | amplify           | TTCAACTTTAAACGGATCCATC                                                                                              |
| CgFKS3c776F           | sequence          | TCCTGTCCCTGTTGAATGCA                                                                                                |
| CgFKS3c1044F          | sequence          | CAATCCAATTTTAGGGGATGG                                                                                               |
| CgFKS3c1316F          | sequence          | ACTCCGGCACTGCACTGG                                                                                                  |
| CgFKS3c1580F          | sequence          | GGTAATATTATTCGGGCAAGG                                                                                               |

<sup>a</sup> Numbers represent location in nucleotides or codons: u, upstream (nucleotides); c, codons; d, downstream (nucleotides).

<sup>b</sup> Sequences corresponding to *S. cerevisiae* URA3 flanking sequences in pRS416 are underlined.

TABLE S2. CSP and MCF susceptibilities of *C. glabrata* WT strains and their CRS-MIS mutants determined by broth microdilution in RPMI medium

| Strain          | Source <sup>a</sup> | WT CSP/MCF               |                          | Mutant CSP/MCF MIC (µg/ml) – CRS-MIS differential |                              |                  |
|-----------------|---------------------|--------------------------|--------------------------|---------------------------------------------------|------------------------------|------------------|
|                 |                     | MIC (µg/ml) <sup>c</sup> | Selection <sup>b,c</sup> | C1                                                | C2                           | C3               |
| 66032u          | 15                  | 0.5/0.016                | YPD/0.2<br>RPMI/0.25     | 1/0.002 – 16<br>4/0.004 – 32                      | 2/0.004 – 16<br>4/0.008 – 16 | 1/0.004 – 8<br>- |
| 380             | 14                  | 0.5/0.016                | YPD/0.25<br>RPMI/0.25    | 1/0.016 – 2<br>2/0.004 – 16                       | 1/0.008 – 4<br>-             | -<br>-           |
| 945             | 14                  | 1/0.016                  | YPD/0.2                  | 4/0.004 – 16                                      | 2/0.002 – 16                 | 2/0.004 – 8      |
| 2807990         | 16                  | 1/0.016                  | YPD/0.25, 0.3            | 2/0.002 – 16                                      | 2/0.001 – 32                 | -                |
| 2806145         | 16                  | 0.5/0.03                 | YPD/0.3                  | 0.5/0.008 – 4                                     | 0.5/0.008 – 4                | -                |
| 34-023-157      | 9                   | 0.5/0.016                | YPD/0.25                 | -                                                 | 0.5/0.008 – 2                | 0.5/0.008 – 2    |
| 34-507-038.02   | 9                   | 0.5/0.016                | YPD/0.25                 | 0.5/0.004 – 4                                     | -                            | -                |
| 33-94R-0024-119 | 9                   | 1/0.016                  | YPD/0.25                 | 2/0.004 – 8                                       | -                            | -                |
| 38326           | ATCC                | 0.5/0.016                | YPD/0.25                 | 1/0.008 – 4                                       | 2/0.008 – 8                  | -                |
| 2001            | ATCC                | 1/0.016                  | YPD/0.2                  | -                                                 | 1/0.008 – 2                  | -                |

<sup>a</sup> Strain source: numbers indicate relevant reference; ATCC, American Type Culture Collection, Masnassas, VA.

<sup>b</sup> Mutants were selected on YPD or RPMI agar with the indicated concentration (µg/ml) of CSP. Following selection, 3 to 22 (median = 6) colonies were tested for each strain, yielding 1 to 6 (median = 3) CRS-MIS mutants.

<sup>c</sup> In our hands, CSP MICs determined by broth microdilution in RPMI were 2 to 4 fold higher than CSP MICs determined on RPMI agar (not shown); this explains why CRS-MIS mutants could be selected on RPMI agar with CSP concentration 2-fold lower than the broth microdilution MIC.
